# Supplementary material for: Synergy Between Low Dose Metronomic Chemotherapy and the pH-Centered Approach Against Cancer
Source: MDPI journal article supplement (doi:10.3390/ijms20215438), 2019-10-31
Supplement: s1 [file s1]

# Supplementary Table

All the dogs shown in the Table were treated with informed consent of their owners.

| Treated with Metronomic Chemotherapy |                                                             |                  |                |
|--------------------------------------|-------------------------------------------------------------|------------------|----------------|
| Dog                                  | Diagnosis                                                   | Chemotherapy     | Surgery        |
| 1                                    | Sertoli testicular tumor with lung metastasis               | No               | No             |
| 2                                    | Non removable squamous cell carcinoma of gum                | No               | No             |
| 3                                    | High grade mast cell tumor with liver and spleen metastasis | No               | No             |
| 4                                    | Femoral osteosarcoma                                        | ?                | Yes            |
| 5                                    | Tubulopapillary carcinoma of mammary gland with metastases. | No response      | Yes            |
| 6                                    | Anaplastic carcinoma of mammary gland with metastasis       | No response      | Yes            |
| 7                                    | Multicentric diffuse lymphoblastic lymphoma.                | No response      | No             |
| TREATED WITH pH CENTERED APPROACH    |                                                             |                  |                |
| 1                                    | Gastric adenocarcinoma                                      | No               | No. Poor risk. |
| 2                                    | Hypodermal hemangiosarcoma with metastases                  | No               | Yes            |
| 3                                    | Oral melanoma with lymph node metastases                    | No               | No             |
| 4                                    | Oral melanoma with lung metastases                          | No               | No             |
| 5                                    | Hepatic Leomyosarcoma with metastases                       | Yes. No response | Yes            |
| 6                                    | Rhabdomyosarcoma of leg with metastases                     | No               | Yes            |
| 7                                    | Squamous cell carcinoma of one tonsil with node metastases  | Yes. No response | No. Big bulk.  |
| TREATED WITH BOTH THERAPIES          |                                                             |                  |                |
| 1                                    | Relapsing abdominal cavity liposarcoma                      | No               | Yes            |
| 2                                    | Relapsing osteosarcoma of the mandible                      | No               | Yes            |
| 3                                    | Nasal carcinoma invading neighboring tissues                | Yes. No response | No             |
| 4                                    | Nasal chondrosarcoma of big size and local invasion         | No               | No             |
| 5                                    | Relapsing invasive transitional cell carcinoma of bladder   | Yes. No response | Yes            |
| 6                                    | Abdominal mesothelioma                                      | No               | Yes            |
| 7                                    | Metastatic bone cancer. No primary tumor identified         | Yes. No response | No             |
